# Supplementary material
Source: publisher figshare collection journal article supplement (https://frontiersin.figshare.com/ndownloader/files/34841697)
Supplement: Supplementary file [file 34841697]

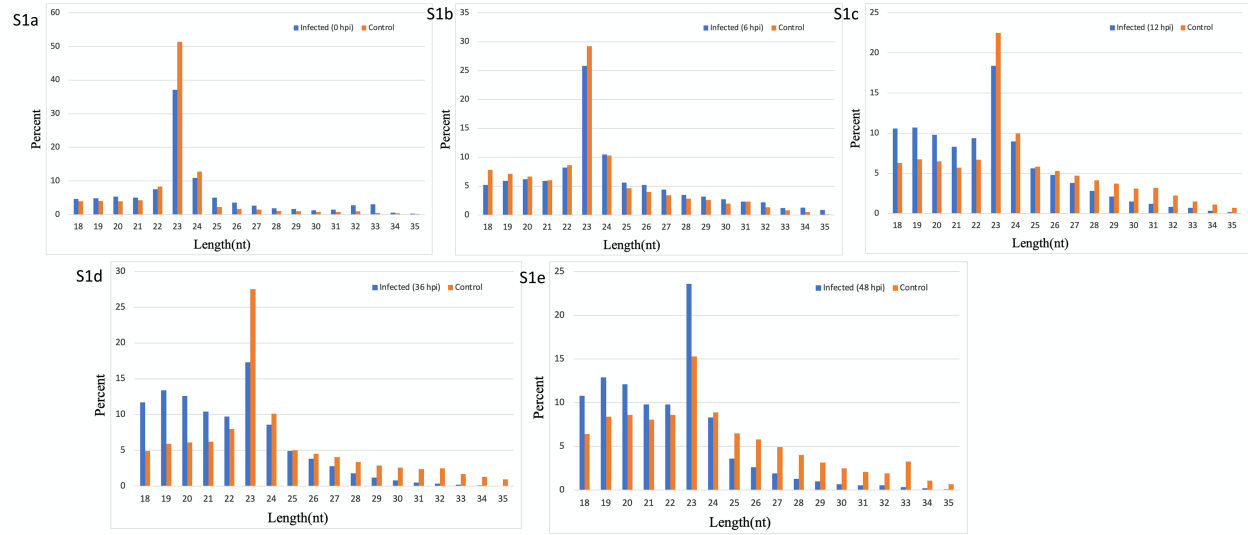

**Supplementary Fig. S1a-S1e.** The length distribution statistics of total sRNA segments obtained at (0 hpi, 6 hpi, 12 hpi, 36 hpi, 48 hpi). The length of reads is proportional to the reads of that length, 23nt is the main observed length.

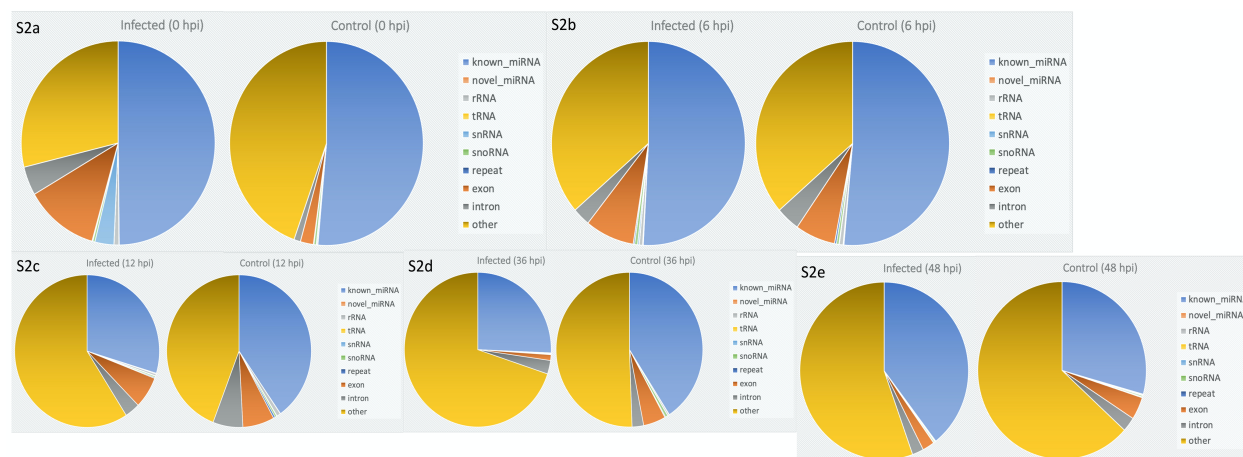

**Supplementary Fig. S2a-S2e.** The pie charts showed total reads of distribution statistics of small RNA and their categories at (0 hpi, 6 hpi, 12 hpi, 36 hpi, 48 hpi). Known miRNAs, novel miRNAs, rRNA, tRNA, snRNA, snoRNA, repeats, exons, introns and other.

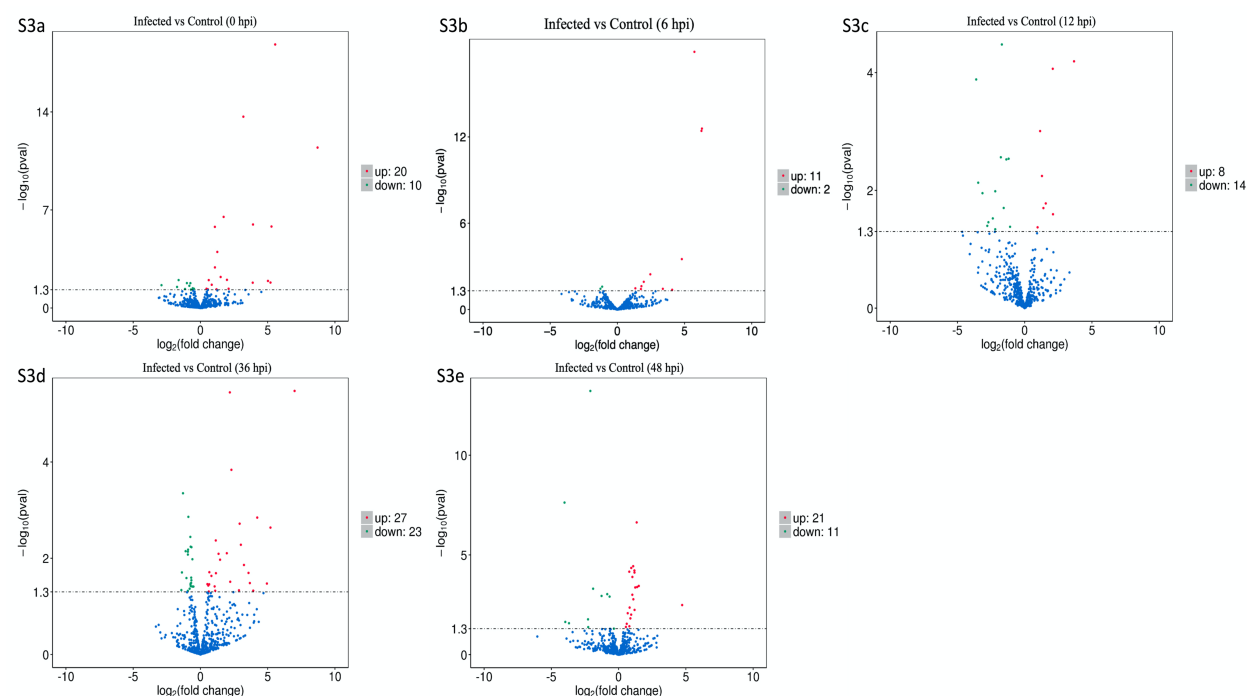

**Supplementary Fig. S3a-S3e.** Volcano chart represents the expression change of miRNA between virus treated and normal non treated cells (0 hpi, 6 hpi, 12 hpi, 36 hpi, 48 hpi). The x-axis shows the  $\log_2$  fold change and y-axis shows the  $-\log_{10}(q\text{-value})$ . The horizontal dotted lines in the figure correspond to  $q\text{-value (default) or adjusted P-value (FDR)} = 0.05$  significant difference threshold. The significant difference threshold of  $\log_2$  fold change  $>1$ , and significant difference threshold of adjusted P-value (FDR)  $=0.05$ . The up-regulated miRNAs are represented by red dots, down-regulated miRNAs are represented by green dots, and blue dots are miRNAs with no significant changes.
